# Supplementary material for: Surface micropatterning technique for surface-enhanced Raman scattering analysis
Source: Royal Society of Chemistry journal article supplement (doi:10.1039/c0ay00068j), 2010-01-01
Supplement: c0ay00068j.pdf [file c0ay00068j.pdf]

Supplementary Material (ESI) for Analytical Methods

This journal is © The Royal Society of Chemistry 2010

## Surface micropatterning technique for surface-enhanced Raman scattering analysis

Weidong Ruan,<sup>ab</sup> Zhicheng Lu,<sup>b</sup> Tieli Zhou,<sup>b</sup> Bing Zhao\*<sup>b</sup> and Li Niu\*<sup>a</sup>

<sup>a</sup>*Engineering Laboratory for Modern Analytical Techniques, <sup>w</sup>/<sub>o</sub> State Key Laboratory of Electroanalytical Chemistry, Changchun Institute of Applied Chemistry, Changchun 130022, P. R. China. E-mail: lniu@ciac.jl.cn; Fax: +86 431 85262800; Tel: +86 431 85262425*

<sup>b</sup>*State Key Laboratory of Supramolecular Structure and Materials, Jilin University, Changchun 130012, P. R. China. E-mail: zhaobing@mail.jlu.edu.cn*

Electronic supplementary information (ESI):

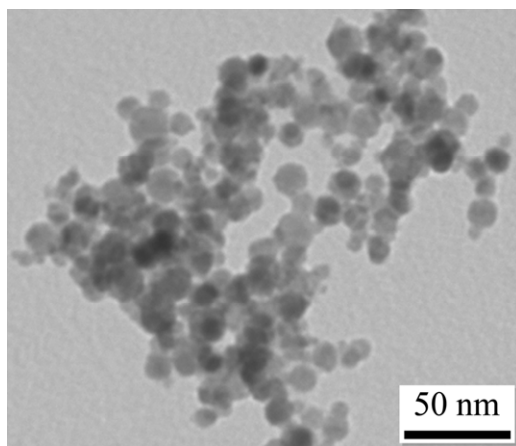

Fig. S1. TEM image of Ag nanoparticles with an average diameter of 12 nm.
